# Supplementary material for: Visible-light-enhanced hydrogen evolution from catalytic hydrolysis of ammonia borane using Ru nanoparticles supported on CdS-modified graphitic carbon nitride
Source: Royal Society of Chemistry journal article supplement (doi:10.1039/d2nj03770j), 2022-01-01
Supplement: d2nj03770j1.pdf [file d2nj03770j1.pdf]

Electronic Supplementary Information

**Visible-light-enhanced hydrogen evolution from catalytic hydrolysis of ammonia borane using Ru nanoparticles supported on CdS-modified graphitic carbon nitride**

Lei Wei,\* Yani Zhang, Jingyang Liu, Yepei Li, Yanhong Lu, Hongyan Liu

College of Chemistry and Materials Science, Langfang Normal University, Langfang 065000, P. R. China

\*Corresponding author. E-mail: [weilei@lfnu.edu.cn](mailto:weilei@lfnu.edu.cn)

**Figure caption**

Fig. S1 Schematic of testing setup for photocatalytic hydrolysis of AB to generate hydrogen

Fig. S2 Particle size distribution of the generated CdS NPs

Fig. S3 Particle size distribution of the deposited Ru NPs

Fig. S4 TR-PL decay curves of the prepared 10-CdS/C<sub>3</sub>N<sub>4</sub> and Ru/CdS/C<sub>3</sub>N<sub>4</sub>

Fig. S5 TEM image of the reused Ru/CdS/C<sub>3</sub>N<sub>4</sub>

Fig. S6 XPS spectrum of the reused Ru/CdS/C<sub>3</sub>N<sub>4</sub>

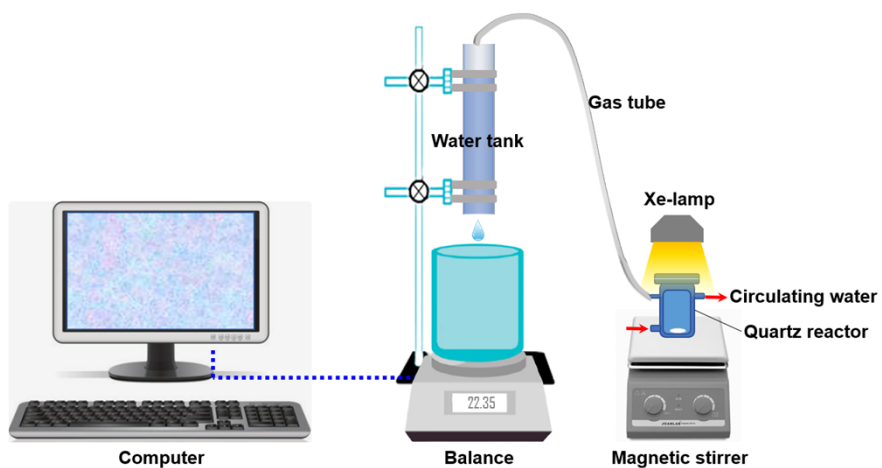

**Fig. S1**

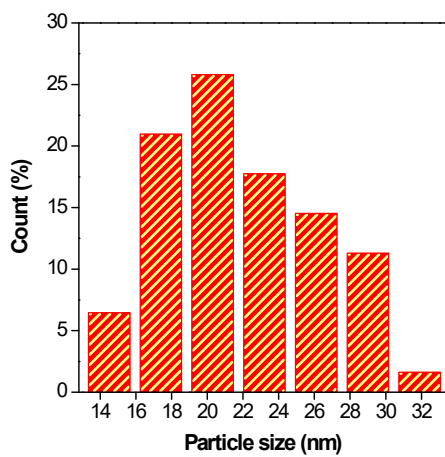

**Fig. S2**

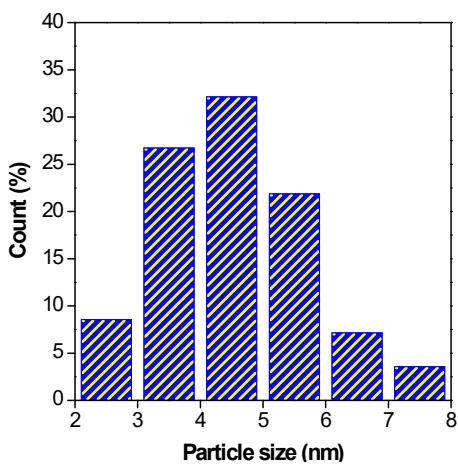

**Fig. S3**

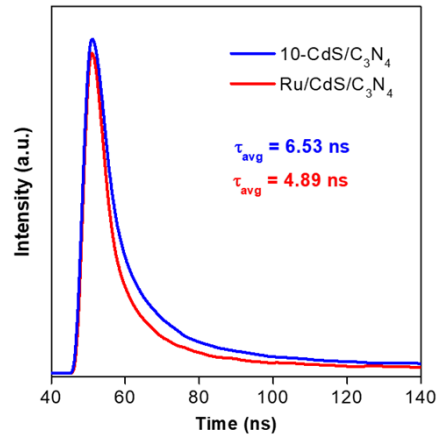

Fig. S4

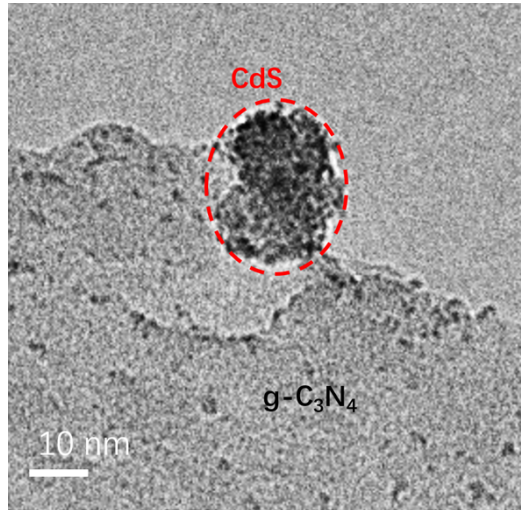

Fig. S5

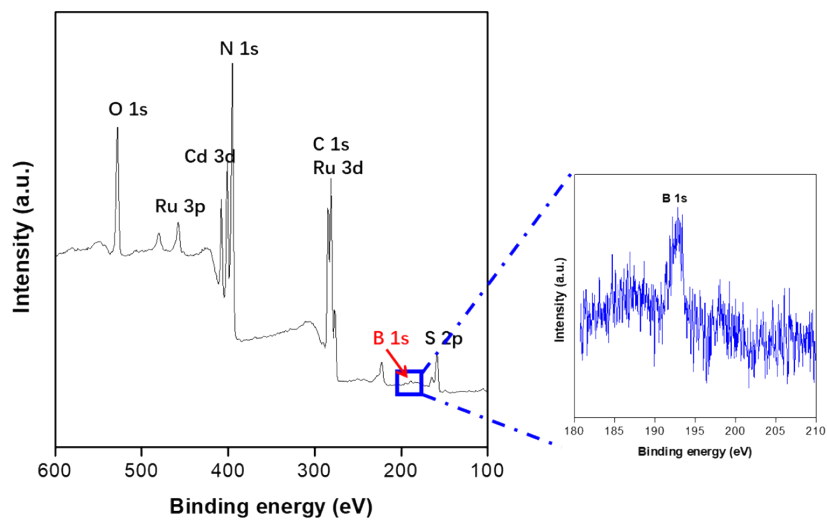

Fig. S6
